# Supplementary material for: Microsatellite analysis reveals connectivity among geographically distant transmission zones of Plasmodium vivax in the Peruvian Amazon: A critical barrier to regional malaria elimination
Source: PLoS Negl Trop Dis. 2019 Nov 11;13(11):e0007876. doi: 10.1371/journal.pntd.0007876 (PMC6874088; doi:10.1371/journal.pntd.0007876)
Supplement: S7 Table — (XLSX) [file pntd.0007876.s011.xlsx]

## Sheet: Sheet1
Study area	Cluster	Season	SMM			IAM			TPM
			p 1 tail	p 2 tails	Hexp	p 1 tail	p 2 tails	Hexp	p 1 tail	p 2 tails	Hexp
CAH	Cluster 2	2012L	NS	< 0.0001	Deficit	NS	NS		NS	< 0.0001	Deficit
		2013H	NS	< 0.0001	Deficit	NS	< 0.001	Deficit	NS	< 0.0001	Deficit
		2013L	NS	< 0.001	Deficit	NS	< 0.001	Deficit	NS	< 0.001	Deficit
	Cluster 3	2012L	NS	< 0.001	Deficit	NS	< 0.001	Deficit	NS	< 0.001	Deficit
		2013H	NS	< 0.001	Deficit	NS	< 0.01	Deficit	NS	< 0.001	Deficit
		2013L	NS	< 0.01	Deficit	NS	< 0.05	Deficit	NS	< 0.05	Deficit
	Cluster 4	2012L	NS	< 0.05	Deficit	NS	< 0.05	Deficit	NS	< 0.05	Deficit
		2013H	NS	< 0.001	Deficit	NS	< 0.001	Deficit	NS	< 0.001	Deficit
		2013L	NS	< 0.001	Deficit	NS	< 0.001	Deficit	NS	< 0.001	Deficit
	Cluster 5	2012L	NS	< 0.001	Deficit	NS	< 0.01	Deficit	NS	< 0.001	Deficit
		2013H	NS	< 0.01	Deficit	NS	< 0.05	Deficit	NS	< 0.01	Deficit
		2013L	NS	NS		< 0.05	NS	Excess	< 0.05	NS	Excess
	Cluster 6	2012L	NS	NS		NS	NS		NS	NS
		2013H	NS	NS		< 0.01	< 0.05	Excess	NS	NS
		2013L	NS	NS		NS	NS		NS	NS
LUP	Cluster 1	2013H	NS	< 0.01	Deficit	NS	NS		NS	< 0.05	Deficit
		2013L	NS	< 0.001	Deficit	NS	< 0.001	Deficit	NS	< 0.001	Deficit
		2014H	NS	< 0.0001	Deficit	NS	< 0.001	Deficit	NS	< 0.0001	Deficit
		2014L	NS	< 0.001	Deficit	NS	< 0.01	Deficit	NS	< 0.001	Deficit
		2015H	NS	< 0.05	Deficit	NS	NS		NS	NS
STE	Cluster 2	2013H	NS	NS		NS	NS		NS	NS
		2013L	NS	< 0.05	Deficit	NS	NS		NS	NS
	Cluster 6	2013H	NS	NS		< 0.001	< 0.001	Excess	< 0.05	NS	Excess
		2013L	< 0.05	< 0.05	Excess	< 0.01	< 0.01	Excess	< 0.05	< 0.05	Excess
p 1 tail: Wilcoxon’s one tail p-value
p 2 tails: Wilcoxon’s two tails p-value
Hexp/eq: behavior of the expected heterozygosity respect to the heterozygosity under population equilibrium
SMM: stepwise mutation model
IAM: infinite allele model
TPM: two phase model
NS: non-significant p-value.
